# Supplementary material
Source: PubMed Central journal article supplement (PMC2943320)
Supplement: supp_M110.120378_jbc.M110.120378-1.pdf [file supp_M110.120378_jbc.M110.120378-1.pdf]

# Supplementary Figure 1

Pyk1

1 2 3 4

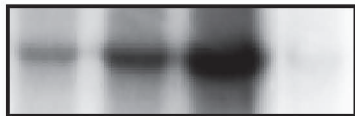

μg 1 5 15 1

Pyk2

5 6 7 8

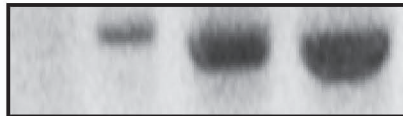

1 1 5 10

Nth1

9 10 11 12

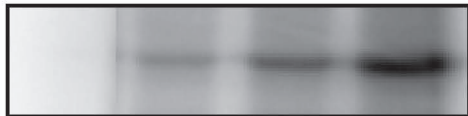

0.5 0.5 1 2

**Supplementary Figure 1. Phosphorylation of Pyk1, Nth1 and Pyk2 by yeast PKA.** Different amounts of each protein (indicated below each line) were submitted to phosphorylation with purified Tpk<sub>s</sub> mixture as kinase source. The phosphorylated samples were subjected to SDS-PAGE and digital imaging. Lane 4, 5 and 9 correspond to the indicated amounts of Pyk1, Pyk2 and Nth1 respectively, incubated without kinase.
